# Supplementary material for: Comparative Study of Two Different Islet Transplantation Sites in Mice: Hepatic Sinus Tract vs Splenic Parenchyma
Source: PubMed Central journal article supplement — Cell Transplant. 2020 Jul 30;29:0963689720943576. doi: 10.1177/0963689720943576 (PMC7563812; doi:10.1177/0963689720943576), 2020-07-30
Supplement: Supplementary.pdf [file Supplementary.pdf]

## Supplementary for “Comparative Study of Two Different Islet Transplantation Sites in mice: Hepatic Sinus Tract vs Splenic Parenchyma”

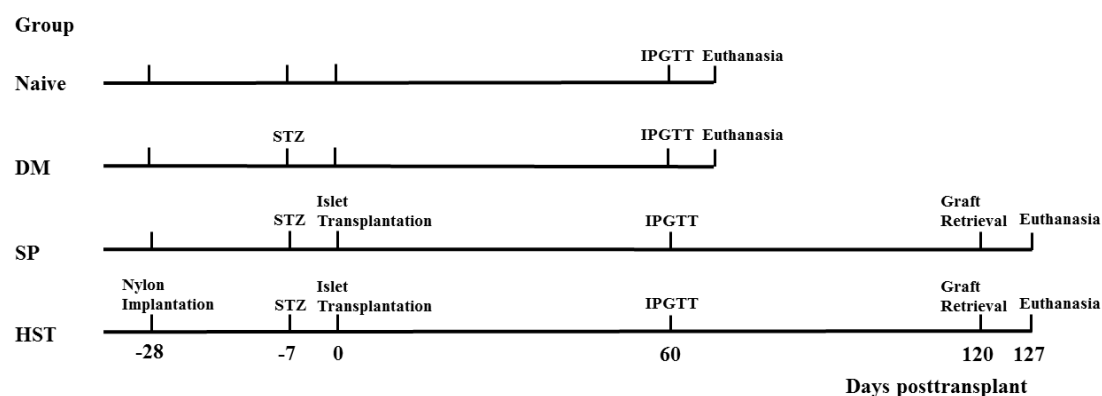

### Supplementary Figure 1

Experimental groups and protocol. On the 28th day before transplantation, mice were randomly divided into groups, and mice in hepatic sinus tract (HST) group were implanted with nylon rods. On the 7th day before transplantation, mice in the HST, splenic parenchyma (SP), and diabetes mellitus (DM) groups were injected with streptozotocin (STZ). On the day of transplantation, the mice whose blood glucose levels did not meet the inclusion criteria were removed, and then islet transplantation was performed in the HST and SP groups. The intraperitoneal glucose tolerance test (IPGTT) was performed on the 60th day post-transplant, and the islet graft was retrieved on the 120th day post-transplant.

### Supplementary Table 1

| Average weight of mice in each group before and after transplantation (g) |            |            |            |            |            |
|---------------------------------------------------------------------------|------------|------------|------------|------------|------------|
| Group                                                                     | Time(day)  |            |            |            |            |
|                                                                           | -28        | -7*        | 0          | 60*        | 120        |
| Naïve                                                                     | 20.73±0.50 | -          | 23.57±0.58 | 25.39±0.57 | -          |
| HST                                                                       | 20.81±0.43 | 21.94±0.52 | 23.39±0.49 | 24.65±0.62 | 29.38±0.86 |
| SP                                                                        | 20.85±0.45 | 22.15±0.46 | 23.50±0.51 | 24.81±0.67 | 29.49±0.94 |
| DM                                                                        | 20.79±0.62 | 22.02±0.48 | 23.44±0.47 | 20.80±0.74 | -          |

HST: hepatic sinus tract; SP: splenic parenchyma; DM: diabetes mellitus;

\*Weight after fasting overnight
